# Supplementary material for: Ornithodoros sonrai Soft Ticks and Associated Bacteria in Senegal
Source: MDPI journal article supplement (doi:10.3390/pathogens12091078), 2023-08-24
Supplement: s1 [file s1]

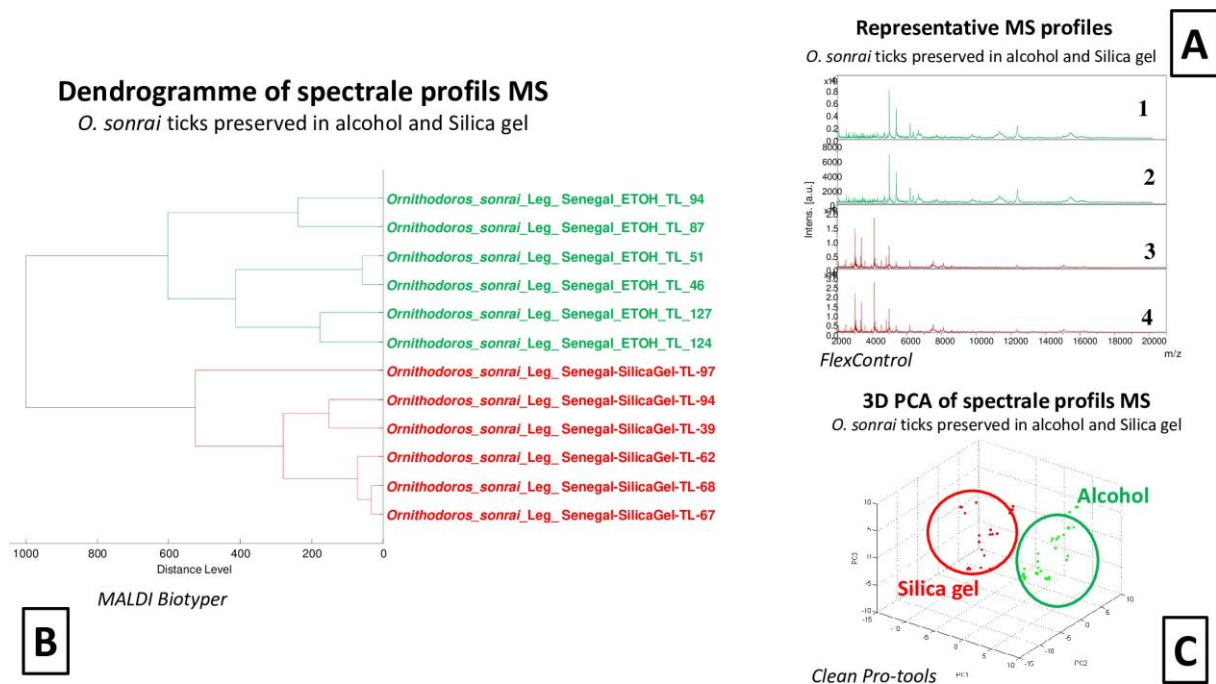

**Supplementary Figure S1.** Comparison of MALDI-TOF MS spectra of *O. sonrai* ticks from the field preserved in silica gel (red) and alcohol (green); (A) Representation and comparison of MS profiles using FlexControl 3.3 software. (B) Dendrogram representation of variability between MS profiles using MALDI Biotyper software, version 3.0; (C) PCA of MS profiles using ClinProTools 2.2 software. a.au = arbitrary units; m/z = mass to charge ratio; TL= TissueLyser.

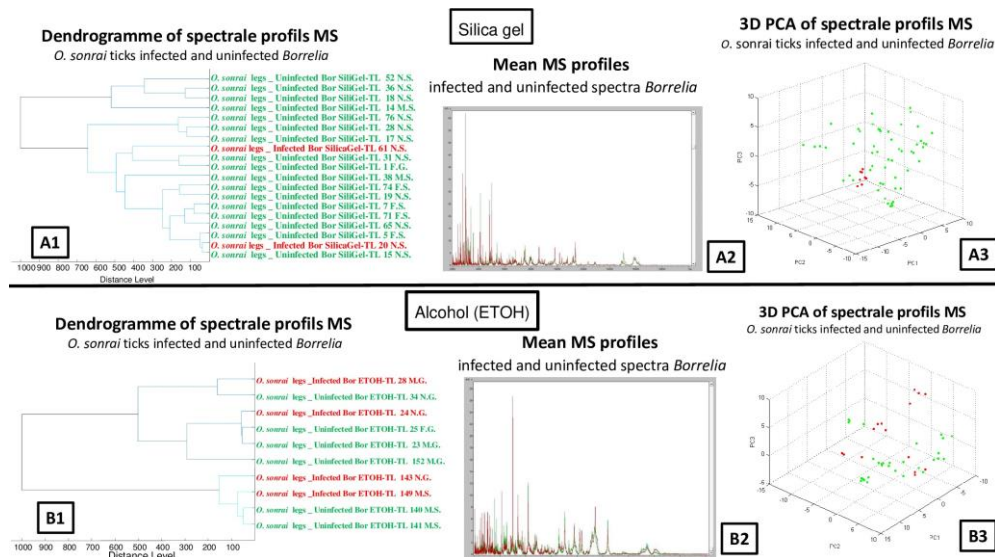

**Supplementary Figure S2.** Comparison of MALDI-TOF MS spectra of *Borrelia*-infected (red) and uninfected (green) *O. sonrai* ticks from the field preserved in silica gel (A1-3) and alcohol (B1-3). Dendrogram representation of the variability between MS profiles preserved in silica gel (A1) and alcohol (B1) using MALDI Biotyper software, version 3.0. Representation and comparison of the average MS profile preserved in silica gel (A2) and alcohol (B2) using ClinProTools 2.2 software. PCA of the MS spectra preserved in silica gel (A3) and alcohol (B3) using ClinProTools 2.2 software. a.au = arbitrary units; m/z = mass/charge ratio; TL= TissueLyser, N=nymph; M=male; F=female; S=not-engorged, G=blood-engorged.

**Supplementary Table S1.** Intra and peri-residential prospection of rodent burrows in the Niakhar area.

| <b>Villages included</b> | <b>Geographical coordinates</b> | <b>Households investigated</b> | <b>Households positive (%)</b> | <b>Burrows surveyed</b> | <b>Burrows positive (%)</b> | <b>Specimen collected</b> |
|--------------------------|---------------------------------|--------------------------------|--------------------------------|-------------------------|-----------------------------|---------------------------|
| Diané Bérédji            | 14°34' N / 16°18' W             | 9                              | 5 (56%)                        | 30                      | 9 (30%)                     | 33                        |
| Ndiambour                | 14°33' N / 16°20' W             | 10                             | 6 (60%)                        | 30                      | 12 (40%)                    | 41                        |
| Dione Thiogome           | 14°35' N / 16°21' W             | 11                             | 4 (36%)                        | 30                      | 10 (33%)                    | 24                        |
| Mbakane Néném            | 14°33' N / 16°23' W             | 6                              | 3 (50%)                        | 30                      | 11 (36%)                    | 34                        |
| Patar                    | 14°33' N / 16°22' W             | 9                              | 6 (66%)                        | 30                      | 17 (56%)                    | 48                        |
| Wakhaldiam               | 14°33' N / 16°24' W             | 10                             | 5 (50%)                        | 30                      | 9 (30%)                     | 28                        |
| Ngayokheme               | 14°32' N / 16°26' W             | 34                             | 15 (44%)                       | 75                      | 31 (41%)                    | 121                       |
| Ndioulbeth               | 14°31' N / 16°22' W             | 11                             | 4 (36%)                        | 30                      | 10 (33%)                    | 49                        |
| Mbadatte                 | 14°32' N / 16°21' W             | 8                              | 5 (63%)                        | 30                      | 11 (36%)                    | 38                        |
| Mback                    | 14°33' N / 16°20' W             | 11                             | 4 (36%)                        | 30                      | 5 (16%)                     | 11                        |
| Ndoss Diaraff            | 14°27' N / 16°21' W             | 8                              | 3 (37%)                        | 30                      | 9 (30%)                     | 22                        |
| Ndoss Mbadiokh           | 14°27' N / 16°21' W             | 9                              | 7 (78%)                        | 30                      | 24 (80%)                    | 109                       |
| Ndoss Ndoffene           | 14°27' N / 16°21' W             | 6                              | 3 (50%)                        | 30                      | 14 (46%)                    | 90                        |
| Mbafaye                  | 14°25' N / 16°24' W             | 9                              | 7 (78%)                        | 30                      | 12 (40%)                    | 25                        |
| Sagne                    | 14°24' N / 16°24' W             | 8                              | 5 (63%)                        | 30                      | 14 (46%)                    | 47                        |
| Godaguéne                | 14°24' N / 16°23' W             | 9                              | 7 (78%)                        | 30                      | 11 (36%)                    | 24                        |
| Mbane                    | 14°22' N / 16°25' W             | 5                              | 3 (60%)                        | 16                      | 10 (33%)                    | 75                        |
| <b>Total</b>             |                                 | <b>173</b>                     | <b>92 (53%)</b>                | <b>541</b>              | <b>219 (41%)</b>            | <b>819</b>                |

**Supplementary Table S2.** Intra and peri-residential prospection of rodent burrows in the Sine-Saloum area.

| Villages included | Geographical coordinates | Households investigated | Households positive (%) | Burrows surveyed | Burrows positive (%) | Specimens  |
|-------------------|--------------------------|-------------------------|-------------------------|------------------|----------------------|------------|
| Dielmo            | 13°42'N - 16°24'W        | 11                      | 2 (18%)                 | 30               | 4 (13%)              | 39         |
| Ndiop             | 13°41'N - 16°23'W        | 10                      | 4 (40%)                 | 30               | 6 (20%)              | 49         |
| Passy             | 13°41'N - 16°23'W        | 13                      | 5 (38 %)                | 30               | 7 (23%)              | 96         |
| Touba Nding       | 13°42'N - 16°25'W        | 12                      | 7 (58%)                 | 30               | 9 (30%)              | 84         |
| Nema Nding        | 13°42'N - 16°24'W        | 23                      | 8 (35%)                 | 45               | 14 (31%)             | 65         |
| Sabouya           | 13°43'N -16.23'W         | 8                       | 1 (13%)                 | 15               | 1 (7%)               | 2          |
| Daga Babou        | 13°45'N - 16°26'W        | 6                       | 3 (50 %)                | 19               | 11 (58%)             | 106        |
| Keur Aliou Diop   | 13°42'N - 16°21'W        | 5                       | 1(20%)                  | 15               | 1 (7%)               | 1          |
| Keur Simon Diene  | 13°45'N - 16°23'W        | 6                       | 2 (33%)                 | 15               | 4 (27%)              | 12         |
| Nema Ba           | 13°37'N - 16°17'W        | 8                       | 1 (12%)                 | 15               | 1 (7%)               | 2          |
| Medina            | 13°42'N - 16°24'W        | 14                      | 0 (0%)                  | 30               | 0 (0%)               | 0          |
| Sourou            | 13.46'N - 16.28'W        | 8                       | 0 (0%)                  | 15               | 0 (0%)               | 0          |
| Bani              | 13°45'N - 16°28'W        | 8                       | 0 (0%)                  | 15               | 0 (0%)               | 0          |
| Firdawsi          | 13°45'N - 16°27'W        | 8                       | 0 (0%)                  | 15               | 0 (0%)               | 0          |
| Keur Lahi Socé    | 13°44'N - 16°25'W        | 8                       | 0 (0%)                  | 15               | 0 (0%)               | 0          |
| <b>TOTAL</b>      |                          | <b>148</b>              | <b>34 (23%)</b>         | <b>334</b>       | <b>58 (17%)</b>      | <b>456</b> |

1

**Supplementary Table S3.** Identification of *Bartonella* spp. with the closest known species using two different genes from *O. sonrai* ticks in Senegal.

| Sample                             | <i>GltA</i> gene detected (200pb)                                                    |                                                                                         | <i>FTSZ</i> gene (290pb)                                                         |                                                                                         |
|------------------------------------|--------------------------------------------------------------------------------------|-----------------------------------------------------------------------------------------|----------------------------------------------------------------------------------|-----------------------------------------------------------------------------------------|
|                                    | GenBank identifications, hosts and accession numbers (similarity, %)                 | Most closely related species fully described; GenBank accession numbers (similarity, %) | GenBank identifications, hosts and accession numbers (similarity, %)             | Most closely related species fully described; GenBank accession numbers (similarity, %) |
| Ticks <i>O. sonrai</i><br>77 OH-FK | Uncultured <i>Bartonella</i> sp.<br><i>Mastomys erythroleucus</i><br>MK892986 (100%) | <i>Bartonella elizabethae</i><br><i>Ctenocephalides felis</i><br>MK660539 (98.49%)      | Uncultured <i>Bartonella</i> sp.<br><i>M. erythroleucus</i><br>MK902922 (99.66%) | <i>Bartonella mastomydis</i><br><i>M. erythroleucus</i><br>KY555065 (98.97%)            |
| Ticks <i>O. sonrai</i><br>77 SG-FK | <i>Bartonella</i> sp.<br><i>Cricetomys gambianus</i><br>JX428749 (100%)              | <i>Bartonella elizabethae</i><br><i>Homo sapiens blood</i><br>GQ225710 (98.45%)         | <i>Bartonella tribocorum</i><br><i>Rattus norvegicus</i><br>AF467759 (97.60%)    | <i>Bartonella tribocorum</i><br><i>Rattus norvegicus</i><br>AF467759 (97.60%)           |
| Ticks <i>O. sonrai</i><br>86 SG-FK | <i>Bartonella</i> sp.<br><i>Cricetomys gambianus</i><br>JX428749 (100%)              | <i>Bartonella elizabethae</i><br><i>Homo sapiens blood</i><br>GQ225710 (98.45%)         | <i>Bartonella tribocorum</i><br><i>Rattus norvegicus</i><br>AF467759 (97.60%)    | <i>Bartonella tribocorum</i><br><i>Rattus norvegicus</i><br>AF467759 (97.60%)           |
| Ticks <i>O. sonrai</i><br>48 SG-FK | <i>Bartonella</i> sp.<br><i>Cricetomys gambianus</i><br>JX428749 (100%)              | <i>Bartonella elizabethae</i><br><i>Homo sapiens blood</i><br>GQ225710 (98.98%)         | <i>Bartonella massiliensis</i><br><i>Ornithodoros sonrai</i><br>100% HM636443    | <i>Bartonella massiliensis</i><br><i>Ornithodoros sonrai</i><br>HM636443 (100%)         |
| Ticks <i>O. sonrai</i><br>39 OH-FK | <i>Bartonella</i> sp.<br><i>Cricetomys gambianus</i><br>JX428749 (98.49)             | <i>Bartonella elizabethae</i><br><i>Homo sapiens blood</i><br>GQ225710 (98.98%)         | <i>Bartonella massiliensis</i><br><i>Ornithodoros sonrai</i><br>100% HM636443    | <i>Bartonella massiliensis</i><br><i>Ornithodoros sonrai</i><br>HM636443 (100%)         |
| Ticks <i>O. sonrai</i><br>19 OH-FK | Uncultured <i>Bartonella</i> sp.<br><i>Xenopsylla cheopis</i><br>MF443365 (100%)     | <i>Bartonella taylorii</i>                                                              | -                                                                                | -                                                                                       |

|                                     |                                                                                    |                                                      |   |
|-------------------------------------|------------------------------------------------------------------------------------|------------------------------------------------------|---|
| Ticks <i>O. sonrai</i><br>79 OH-FK  | Uncultured <i>Bartonella</i> sp.<br><i>Xenopsylla cheopis</i><br>MF443365 (99.50%) | <i>Apodemus agrarius</i><br><b>AY584853 (94.47%)</b> | - |
| Ticks <i>O. sonrai</i><br>73 OH-FK  | <i>Bartonella</i> sp.<br><i>Crocidura olivieri</i><br>KM233490 (100%)              | <i>Bartonella florencae</i>                          | - |
| Ticks <i>O. sonrai</i><br>107 OH-FK | <i>Bartonella</i> sp.<br><i>Crocidura olivieri</i><br>KM233490 (100%)              | <i>Crocidura russula</i><br><b>HM622142 (97.46%)</b> | - |
